# Supplementary material
Source: publisher site journal article supplement (https://kjim.org/upload/media/kjim-2024-006-Supplementary-Table-1.pdf)
Supplement: Supplementary file 1 [file kjim-2024-006-Supplementary-Table-1.pdf]

**Supplementary Table 1. Overview of intestinal BD related surgical procedure**

| Variable              | Total patients with surgery<br>(n = 167) | Gallstone group with surgery<br>(n = 73) | Renal stone group with surgery<br>(n = 18) |
|-----------------------|------------------------------------------|------------------------------------------|--------------------------------------------|
| Right hemicolectomy   | 74 (44.3)                                | 40 (54.7)                                | 9 (50.0)                                   |
| Ileocectomy           | 73 (43.7)                                | 20 (27.3)                                | 6 (33.3)                                   |
| Small bowel resection | 7 (4.1)                                  | 7 (9.5)                                  | 1 (5.5)                                    |
| Others                | 13 (7.7)                                 | 6 (8.2)                                  | 2 (11.1)                                   |

Values are presented as number (%).  
BD, Behçet's disease.
